# Supplementary material for: Isolation of a uranyl amide by “ate” complex formation
Source: Royal Society of Chemistry journal article supplement (doi:10.1039/c001976c), 2010-01-01
Supplement: c001976c.pdf [file c001976c.pdf]

Supporting Information For:

**Isolation of a uranyl amide by “ate” complex formation**

Lani A. Seaman, David D. Schnaars, Guang Wu and Trevor W. Hayton\*

Department of Chemistry and Biochemistry, University of California Santa Barbara,  
Santa Barbara CA 93106

\*To whom correspondence should be addressed. Email: [hayton@chem.ucsb.edu](mailto:hayton@chem.ucsb.edu)

## Experimental

**General.** All reactions and subsequent manipulations were performed under anaerobic and anhydrous conditions either under high vacuum or an atmosphere of nitrogen or argon. Hexanes, diethyl ether, THF and toluene were dried by passage over activated molecular sieves using a Vacuum Atmospheres solvent purification system. DME was distilled from Na/benzophenone before use, while C<sub>6</sub>D<sub>6</sub> and THF-*d*<sub>8</sub> were dried over activated 4Å molecular sieves for 24 h. UO<sub>2</sub>Cl<sub>2</sub>(THF)<sub>3</sub> and LiS<sup>t</sup>Bu were prepared by the published procedures.<sup>1, 2</sup> All other reagents were purchased from commercial suppliers and used as received.

NMR spectra were recorded on either a Varian UNITY INOVA 400 MHz or 500 MHz spectrometer. <sup>1</sup>H NMR and <sup>13</sup>C{<sup>1</sup>H} NMR spectra are referenced to external SiMe<sub>4</sub> using the residual protio solvent peaks as internal standards. <sup>7</sup>Li{<sup>1</sup>H} NMR spectra referenced to an external saturated solution of LiCl in deuterium oxide. Elemental analyses were performed by the Microanalytical Laboratory at UC Berkeley. IR spectra were recorded on a Mattson Genesis FTIR spectrometer.

**Li(NC<sub>5</sub>H<sub>10</sub>).** To a solution of piperidine (3.0 mL, 30.4 mmol) in hexanes (20 mL) at 0 °C was added *n*-BuLi (1.6 M in hexanes, 19 mL, 30.4 mmol) dropwise via syringe. An off-white solid formed immediately. The reaction was stirred 24 hours and the solvent was decanted by means of a filter cannula. The solid was dried in vacuo to give 2.48 g of pale yellow powder. Yield 90%. <sup>1</sup>H NMR (500 MHz, 25 °C, C<sub>6</sub>D<sub>6</sub>): δ 3.20 (m, 6H, CH<sub>2</sub>), 1.82 (m, 4H, CH<sub>2</sub>). <sup>7</sup>Li{<sup>1</sup>H} NMR (194 MHz, 25 °C, C<sub>6</sub>D<sub>6</sub>): δ -1.71 (s).

**Li(NH-2,6-Me<sub>2</sub>C<sub>6</sub>H<sub>3</sub>).** To a solution of 2,6-dimethylaniline (0.20 mL, 1.62 mmol) in

hexanes (10 mL) was added *n*-BuLi (1.6 M in hexanes, 1.01 mL, 1.64 mmol) dropwise via syringe. A pale yellow solid formed immediately. The reaction was stirred 20 minutes and cooled to -25° C for 24 hours. The supernatant was then decanted and the remaining solid was dried in vacuo to give 179 mg of pale yellow solid. Yield 87 %. <sup>1</sup>H NMR (500 MHz, 25 °C, C<sub>6</sub>D<sub>6</sub>): δ 7.06 (m, 2H, *m*-H), 6.47 (m, 1H, *p*-H), 2.81 (s, 1H, NH), 2.27 (s, 6H, CH<sub>3</sub>). <sup>7</sup>Li{<sup>1</sup>H} NMR (194 MHz, 25 °C, C<sub>6</sub>D<sub>6</sub>): δ -0.978 (s).

**[Li(DME)][{Li(DME)}<sub>2</sub>Cl][UO<sub>2</sub>(NC<sub>5</sub>H<sub>10</sub>)<sub>3</sub>]<sub>2</sub> (1).** To a DME solution (2 mL) of LiNC<sub>5</sub>H<sub>10</sub> (90 mg, 0.99 mmol) was added a THF solution (2 mL) of UO<sub>2</sub>Cl<sub>2</sub>(THF)<sub>3</sub> (138 mg, 0.25 mmol). An immediate color change from pale-yellow to dark-brown was observed. After stirring for 10 minutes the solution was filtered through a Celite column (2 cm × 0.5 cm) supported on glass wool. The solution was then layered with hexanes (3 ml) and cooled to -25° C for 24 hours resulting in the deposition of clear crystals. The mixture was filtered through a Celite column (2 cm × 0.5 cm) supported on glass wool. The supernatant was then concentrated and layered with hexanes (3 mL) and cooled to -25° C for 24 hours resulting in the deposition of a black crystalline solid. 82 mg, 48% yield. Anal. Calcd for C<sub>42</sub>H<sub>90</sub>ClLi<sub>3</sub>N<sub>6</sub>O<sub>10</sub>U<sub>2</sub>: C, 36.78; H, 6.61; N, 6.13. Found: C, 36.71; H, 6.62; N, 5.63. <sup>1</sup>H NMR (500 MHz, 25° C, C<sub>6</sub>D<sub>6</sub>): δ 7.81 (br s, 16H, terminal α CH<sub>2</sub>), 7.00 (br s, 8H, bridging α CH<sub>2</sub>), 3.18 (s, CH<sub>3</sub> DME), 2.99 (s, CH<sub>2</sub> DME), 2.38 (br s, 4H, bridging CH<sub>2</sub>), 2.20 (br s, 8H, bridging CH<sub>2</sub>), 2.12 (br s, 16H, terminal CH<sub>2</sub>), 2.04 (s, 8H, terminal CH<sub>2</sub>). <sup>7</sup>Li{<sup>1</sup>H} NMR (194 MHz, 25° C, C<sub>6</sub>D<sub>6</sub>): δ -3.39 (s). IR (KBr pellet, cm<sup>-1</sup>): 1645(w), 1587(w), 1548(w), 1530(w), 1465(sh), 1448(s), 1439(s), 1354(s), 1332(m), 1317(sh), 1283(sh), 1268(m), 1243(m), 1192(s), 1152(sh), 1133(sh), 1109(s), 1100(s), 1021(s), 978(w), 955(w), 923(w), 896(s), 868(s), 848(s), 805(s), 709(m),

667(w), 603(m), 582(m).

**[Li(THF)(Et<sub>2</sub>O)][UO<sub>2</sub>(NH-2,6-Me<sub>2</sub>C<sub>6</sub>H<sub>3</sub>)<sub>4</sub>] (2).** To a cold (-25° C) Et<sub>2</sub>O solution (2 mL) of UO<sub>2</sub>Cl<sub>2</sub>(THF)<sub>3</sub> (26 mg, 0.047 mmol) was added a cold Et<sub>2</sub>O solution (2 mL) of LiNH-2,6-Me<sub>2</sub>C<sub>6</sub>H<sub>3</sub> (23 mg, 0.18 mmol). After stirring for 10 minutes the solution was filtered through a Celite column (2 cm × 0.5 cm) supported on glass wool. The resulting red-brown solution was layered with hexanes (3 ml) and cooled to -25° C for 24 hours resulting in the deposition of a small amount of dark red solid. Recrystallization of this solid by vapor diffusion of hexanes into an Et<sub>2</sub>O solution provided a few dark red rods that were of X-ray quality (Yield: < 2%).

**[Li(DME)]<sub>2</sub>[UO<sub>2</sub>(S<sup>t</sup>Bu)<sub>4</sub>] (3).** A solution of LiS<sup>t</sup>Bu (57 mg, 0.59 mmol) in Et<sub>2</sub>O was added to a yellow solution of UO<sub>2</sub>Cl<sub>2</sub>(THF)<sub>3</sub> (54 mg, 0.096 mmol) in DME at -25 °C. Over the course of 5 minutes, the solution changed from orange to dark green to deep orange-red in colour. After stirring for 30 min the resulting solution was filtered through a Celite column supported on glass wool (0.5 cm × 2 cm). The filtrate was concentrated in vacuo, layered with hexanes (2 mL), and stored at -25 °C for 78 hours resulting in the deposition of bright orange crystals and a white powder (presumably LiCl). The white solid was removed by washing with DME (2 × 0.5 mL), providing 58 mg of orange crystals. A second batch of crystals was isolated from the supernatant in a similar fashion (18 mg). Total: 76 mg, 96% yield. Anal. Calcd for UO<sub>6</sub>S<sub>4</sub>Li<sub>2</sub>C<sub>24</sub>H<sub>56</sub>: C, 35.12; H, 6.88. Found: C, 36.26; H, 6.97. <sup>1</sup>H NMR (THF-*d*<sub>8</sub>, 25 °C, 400 MHz): δ 1.75 (s, 36H, CMe<sub>3</sub>), 3.27 (s, 12H, CH<sub>3</sub>), 3.43 (s, 8H, CH<sub>2</sub>). <sup>7</sup>Li{<sup>1</sup>H} NMR (THF-*d*<sub>8</sub>, 25 °C, 155 MHz): δ 2.33 (s). IR (KBr pellet, cm<sup>-1</sup>): 1514(w), 1504(sh w), 1470(vs), 1455(vs), 1409(m), 1386(m), 1324(w), 1308(w), 1279(m), 1244(m), 1210(m), 1194(s), 1157(vs), 1119(vs), 1111(sh s),

1080(vs), 1076(m), 1019(m), 990(w), 955(w), 940(w), 926(w), 891(vs,  $\nu_{\text{asym}}(\text{U}=\text{O})$ ), 868(vs), 836(m), 827(sh m), 589(s), 576(sh m), 562(sh m), 535(sh m), 524(sh m), 515(sh m), 499(sh m), 460(s), 455(sh s), 445(sh s), 432(s), 417(sh s), 410(s).

**X-ray Crystallography.** Crystals of  $\mathbf{1} \cdot \frac{1}{2}\text{C}_6\text{H}_{14}$  or **2** were mounted on a glass fiber under Paratone-N oil. Data collection was carried out on a Bruker 3-axis platform diffractometer with SMART-1000 CCD detector. The instrument was equipped with graphite monochromatized MoK $\alpha$  X-ray source ( $\lambda = 0.71073 \text{ \AA}$ ). All data were collected at 150(2) K using Oxford nitrogen gas cryostream system. A hemisphere of data was collected using  $\omega$  scans, with 10-second (for  $\mathbf{1} \cdot \frac{1}{2}\text{C}_6\text{H}_{14}$ ) or 20-second (for **2**) frame exposures, and  $0.3^\circ$  frame widths. SMART<sup>3</sup> was used to determine the cell parameters and data collection. The raw frame data were processed using SAINT.<sup>4</sup> The empirical absorption correction was applied based on Psi-scan. Subsequent calculations were carried out using SHELXTL.<sup>5</sup> The structures were solved using Direct methods and difference Fourier techniques. All hydrogen atom positions were idealized, and rode on the atom of attachment. The final refinement included anisotropic temperature factors on all non-hydrogen atoms. Structure solution, refinement, graphics, and creation of publication materials were performed using SHELXTL. A summary of relevant crystallographic data for  $\mathbf{1} \cdot \frac{1}{2}\text{C}_6\text{H}_{14}$  and **2** is presented in Table S1.

**Table S1.** X-ray Crystallographic Data for Complexes **1**·½C<sub>6</sub>H<sub>14</sub> and **2**.

|                                                               | <b>1</b> ·½C <sub>6</sub> H <sub>14</sub>                                                       | <b>2</b>                                                                        |
|---------------------------------------------------------------|-------------------------------------------------------------------------------------------------|---------------------------------------------------------------------------------|
| Empirical formula                                             | C <sub>45</sub> H <sub>97</sub> ClLi <sub>3</sub> N <sub>6</sub> O <sub>10</sub> U <sub>2</sub> | C <sub>48</sub> H <sub>76</sub> Li <sub>2</sub> N <sub>4</sub> O <sub>6</sub> U |
| Crystal Habit, color                                          | irregular, black                                                                                | sheet, red                                                                      |
| Crystal size (mm)                                             | 0.6 × 0.4 × 0.3                                                                                 | 0.5 × 0.25 × 0.2                                                                |
| Crystal system                                                | triclinic                                                                                       | triclinic                                                                       |
| Space group                                                   | P-1                                                                                             | P-1                                                                             |
| Volume (Å <sup>3</sup> )                                      | 2931.8(5)                                                                                       | 1220.0(6)                                                                       |
| a (Å)                                                         | 12.5313(12)                                                                                     | 9.001(3)                                                                        |
| b (Å)                                                         | 12.7238(13)                                                                                     | 11.766(4)                                                                       |
| c (Å)                                                         | 19.6221(19)                                                                                     | 12.875(4)                                                                       |
| α (°)                                                         | 83.505(2)                                                                                       | 115.047(4)                                                                      |
| β (°)                                                         | 73.948(2)                                                                                       | 92.432(4)                                                                       |
| γ (°)                                                         | 77.607(2)                                                                                       | 96.819(4)                                                                       |
| Z                                                             | 2                                                                                               | 1                                                                               |
| Formula weight (g/mol)                                        | 1414.62                                                                                         | 1057.04                                                                         |
| Density (calculated) (Mg/m <sup>3</sup> )                     | 1.602                                                                                           | 1.439                                                                           |
| Absorption coefficient (mm <sup>-1</sup> )                    | 5.615                                                                                           | 3.375                                                                           |
| F <sub>000</sub>                                              | 1398.0                                                                                          | 538                                                                             |
| Total no. reflections                                         | 25453                                                                                           | 10192                                                                           |
| Unique reflections                                            | 11708                                                                                           | 4843                                                                            |
| Final R indices [ <i>I</i> > 2σ( <i>I</i> )]                  | R1 = 0.0441<br>wR2 = 0.1106                                                                     | R1 = 0.0303<br>wR2 = 0.0752                                                     |
| Largest diff. peak and hole (e <sup>-</sup> Å <sup>-3</sup> ) | 3.568 and -1.460                                                                                | 2.255 and -1.516                                                                |
| GOF                                                           | 1.009                                                                                           | 1.047                                                                           |

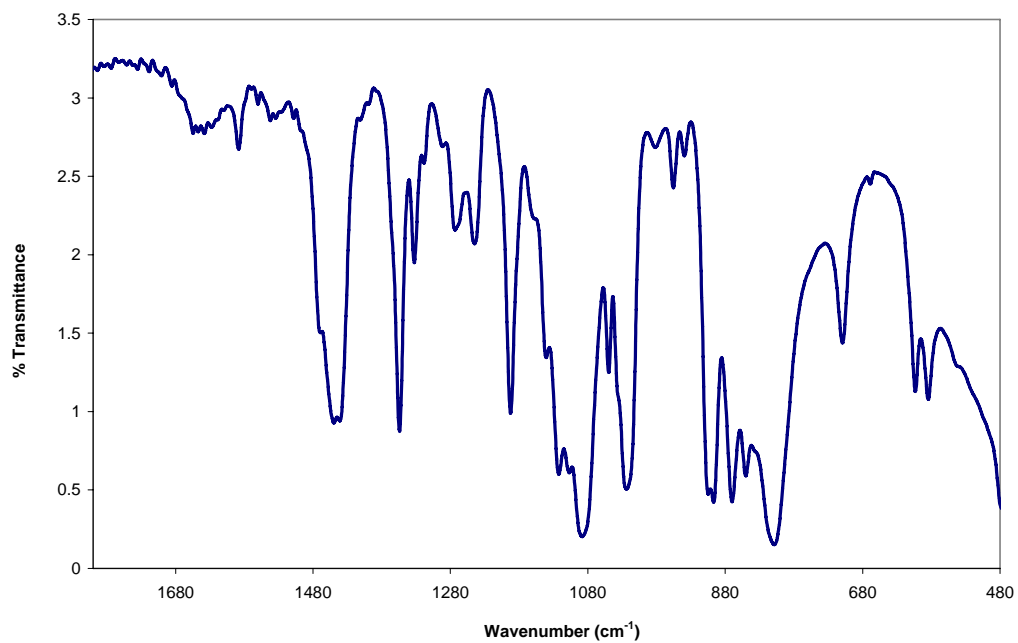

**Figure S1.** IR spectrum (KBr pellet) of **1**.

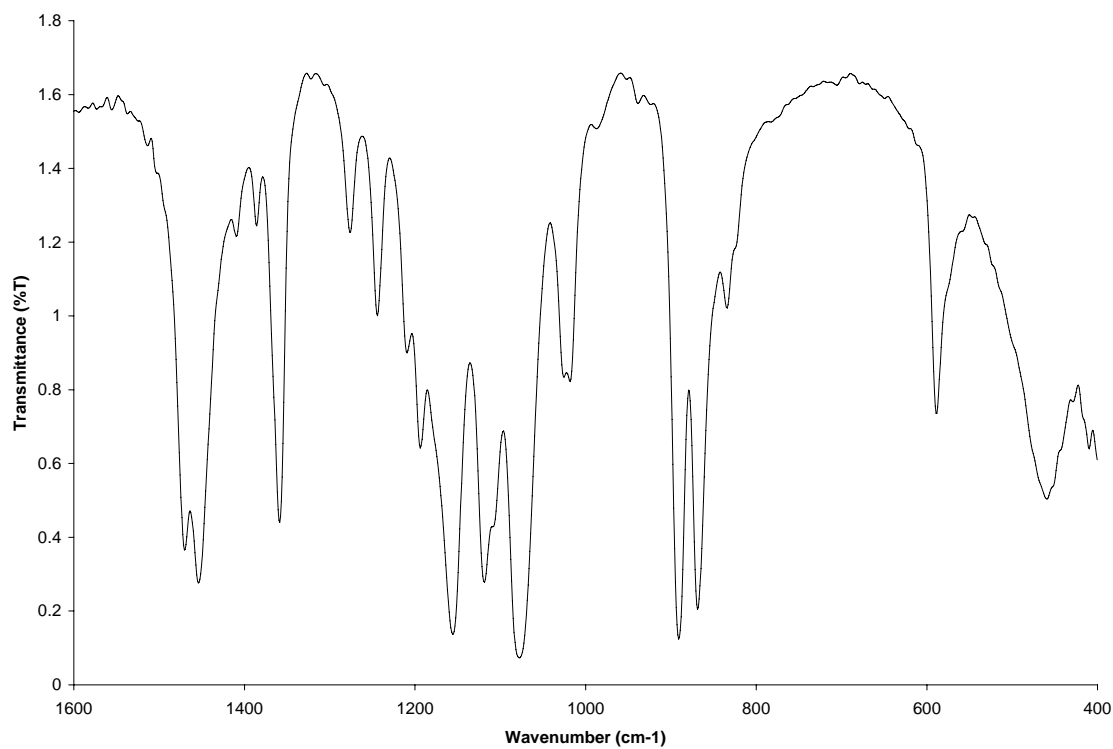

**Figure S2.** IR spectrum of complex **3** (as KBr mull).

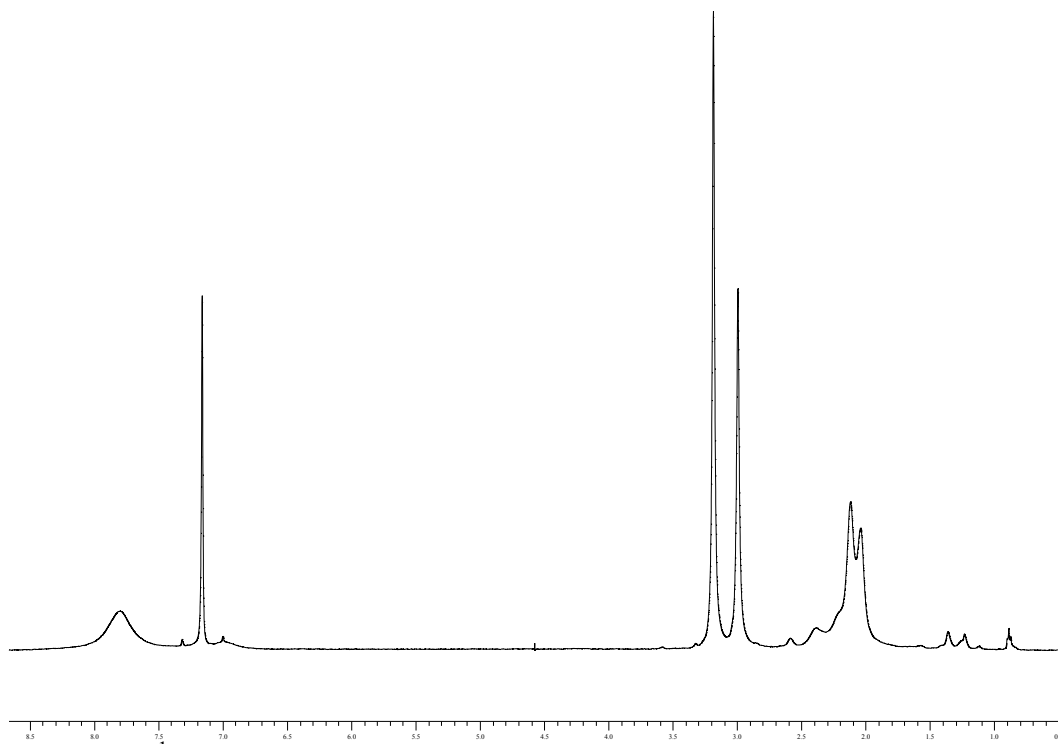

**Figure S3.**  $^1\text{H}$  NMR spectrum ( $\text{C}_6\text{D}_6$ ) of **1**.

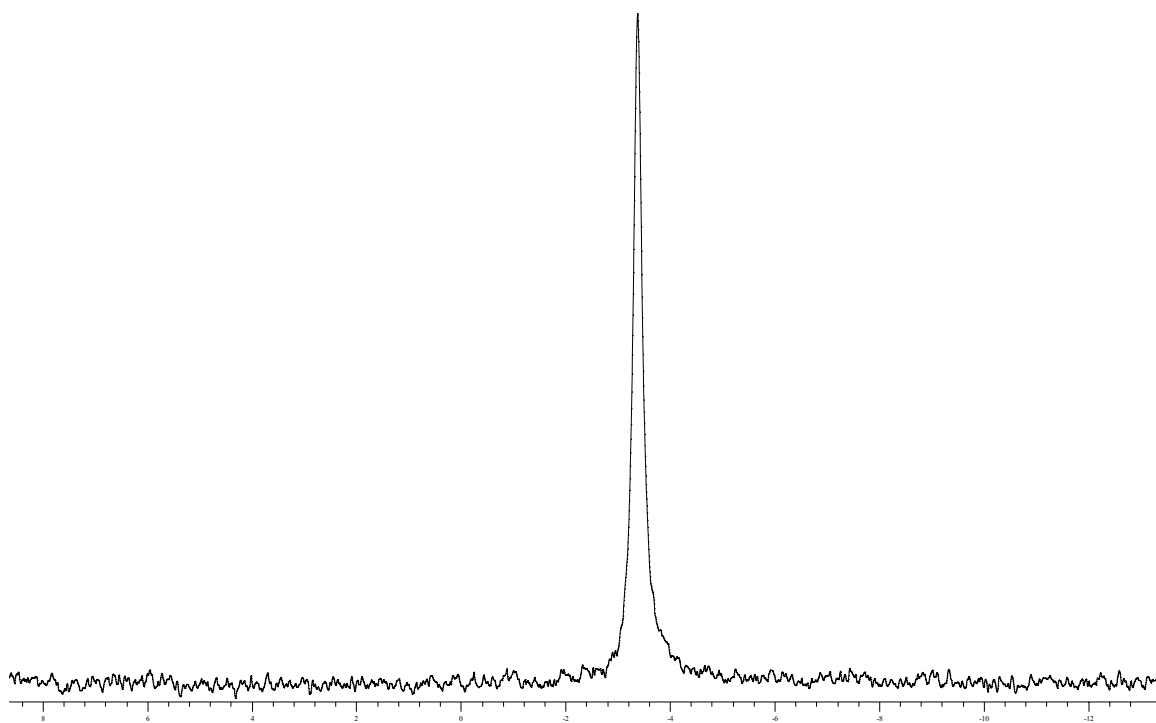

**Figure S4.**  $^7\text{Li}\{^1\text{H}\}$  NMR spectrum ( $\text{C}_6\text{D}_6$ ) of **1**.



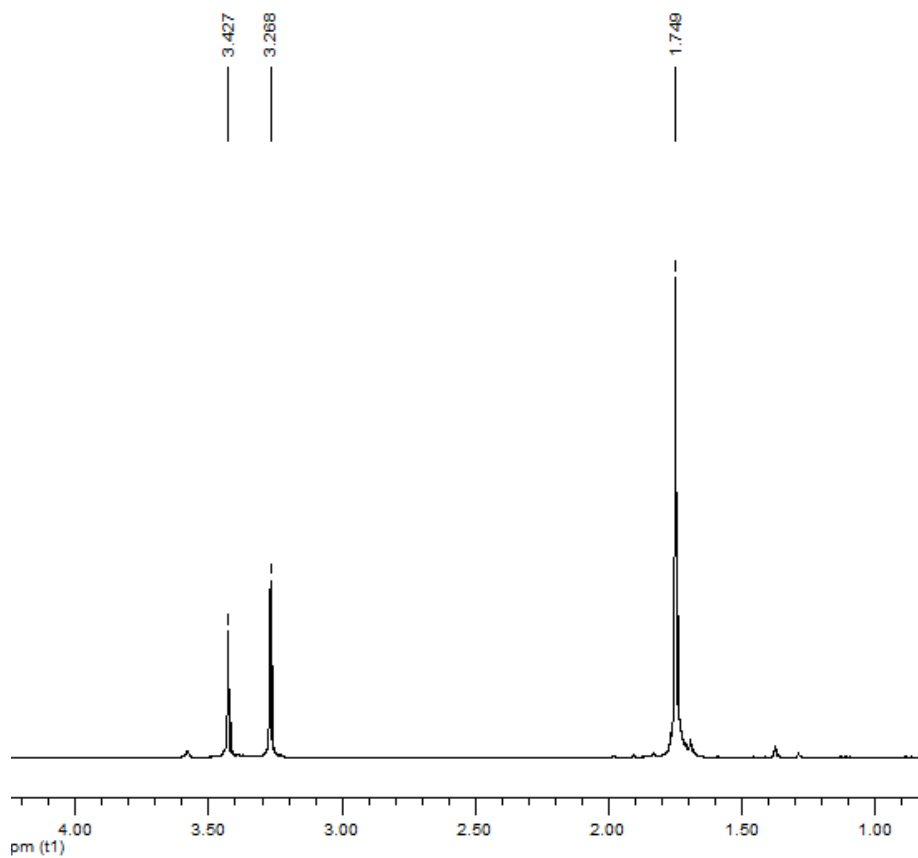

**Figure S5.**  $^1\text{H}$  NMR spectrum of **3** in  $\text{THF-}d_8$ .

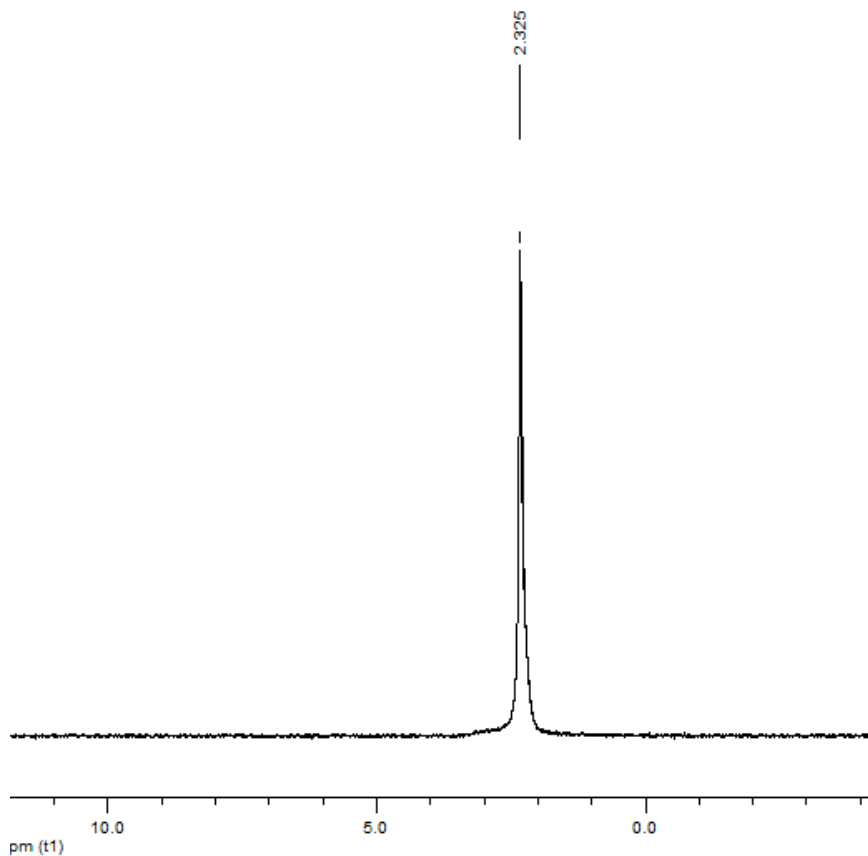

**Figure S6.**  ${}^7\text{Li}\{{}^1\text{H}\}$  NMR spectrum of **3** in  $\text{THF-}d_8$ .

### References

1. M. P. Wilkerson, C. J. Burns, R. T. Paine and B. L. Scott, *Inorg. Chem.*, 1999, **38**, 4156-4158.
2. R. Koster, G. Seidel and R. Boese, *Chem. Ber.*, 1988, **121**, 1137-1142.
3. SMART Software Users Guide, Bruker Analytical X-ray Systems Inc, Madison, WI, 1999.
4. SAINT Software Users Guide, Bruker Analytical X-ray Systems Inc, Madison, WI, 1999.
5. G. M. Sheldrick, Bruker Analytical X-ray Systems Inc, Madison, WI, 2001.
